# Supplementary material for: Rutile TiO2 nanowire arrays interconnected with ZnO nanosheets for high performance electrochemical UV sensors
Source: Royal Society of Chemistry journal article supplement (doi:10.1039/c9tc02217a), 2019-01-01
Supplement: c9tc02217a1.pdf [file c9tc02217a1.pdf]

## Supplementary information (ESI)

### **Rutile TiO<sub>2</sub> nanowire arrays interconnected with ZnO nanosheets for high performance electrochemical UV sensors**

Youqing Wang,<sup>a</sup> Lulu Chen,<sup>b</sup> Hui Zhou,<sup>a</sup> Kun Wei,<sup>c</sup> Ziran Zhu,<sup>c</sup> Erqing Xie,<sup>c</sup> Wenbin Cao\*<sup>a</sup> and Weihua Han\*<sup>c</sup>

<sup>a</sup> *Department of Physics, Shaanxi University of Science and Technology, Xi'an 710021, China.*

<sup>b</sup> *School of Electric Power, North China University of Water Resources and Electric Power, Zhengzhou 450045, China.*

<sup>c</sup> *School of Physical Science and Technology, Lanzhou University, Lanzhou 730000, China.*

\* Corresponding authors. Tel.: +86 931 8912616; Fax: +86 931 8913554.

E-mail addresses: [caowenbin@sust.edu.cn](mailto:caowenbin@sust.edu.cn) (Wenbin Cao); [hanwh@lzu.edu.cn](mailto:hanwh@lzu.edu.cn) (Weihua Han)

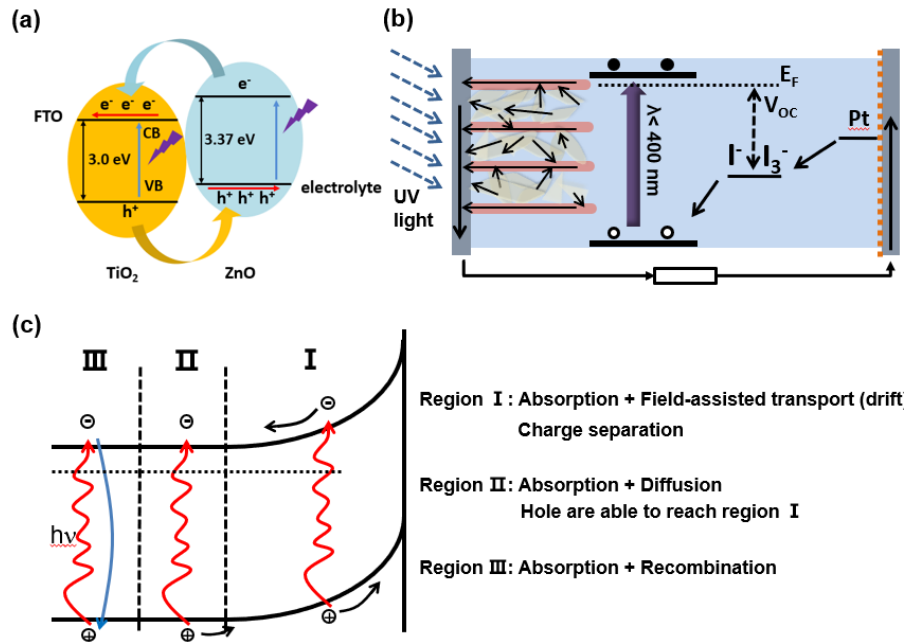

**Fig. S1** (a) Schematic description of the energy band alignment of the TiO<sub>2</sub>/ZnO heteronanostructure. (b) Energetics operation of photoelectrochemical-type UV sensor using TiO<sub>2</sub>/ZnO heteronanostructure as photoanode. (c) Absorption regions in a semiconducting photoanode.<sup>1</sup>

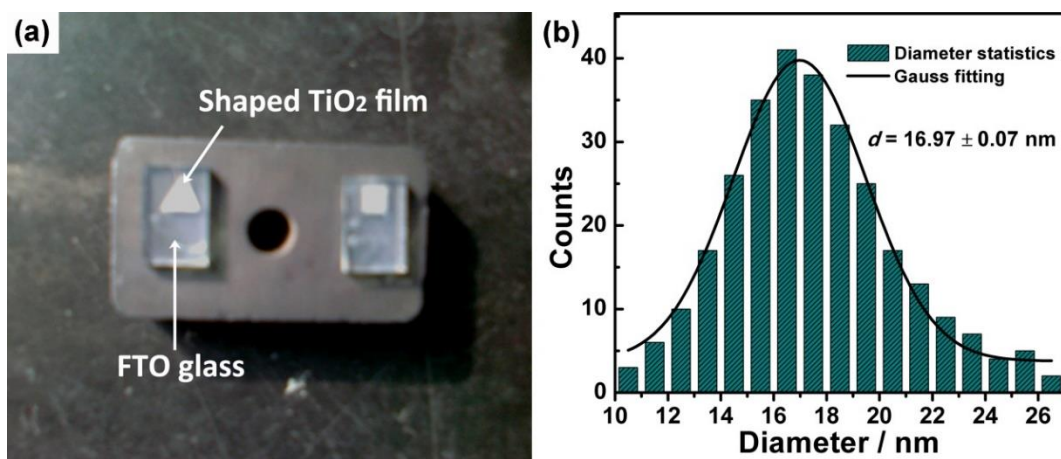

**Fig. S2** (a) Optical photograph of the shaped TiO<sub>2</sub> nanowire films prepared through hydrothermal method and (b) diameter statistics of the TiO<sub>2</sub> nanowires.

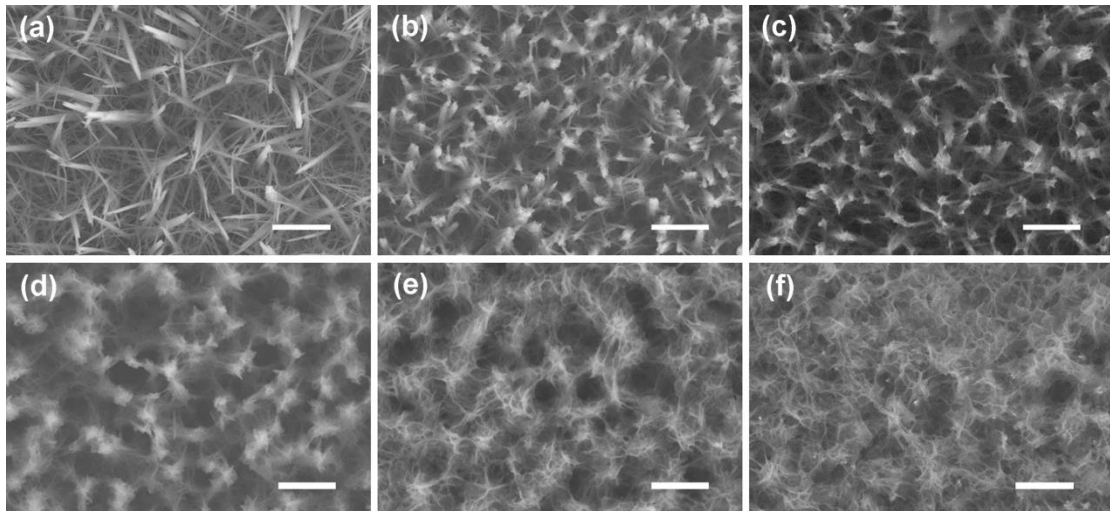

**Fig. S3** Top-view SEM image of (a) TiO<sub>2</sub> nanowires and serial TiO<sub>2</sub>/ZnO hierarchical nanostructures prepared at various hydrothermal reaction time: (b) 1h, (c) 2h, (d) 4h, (e) 6h and (f) 8h. All the scale bars are 1  $\mu\text{m}$ .

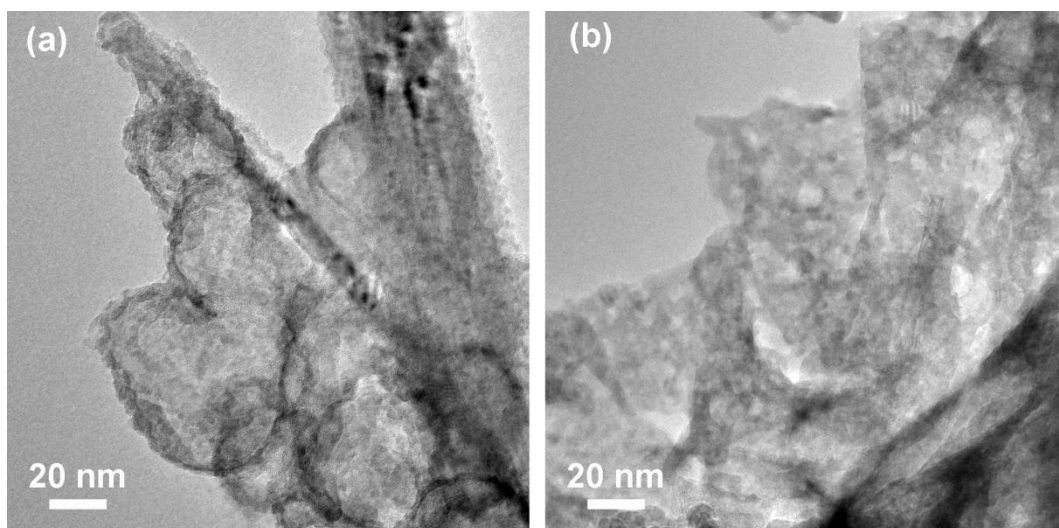

**Fig. S4** TEM images of the discrete TiO<sub>2</sub>/ZnO heterostructure.

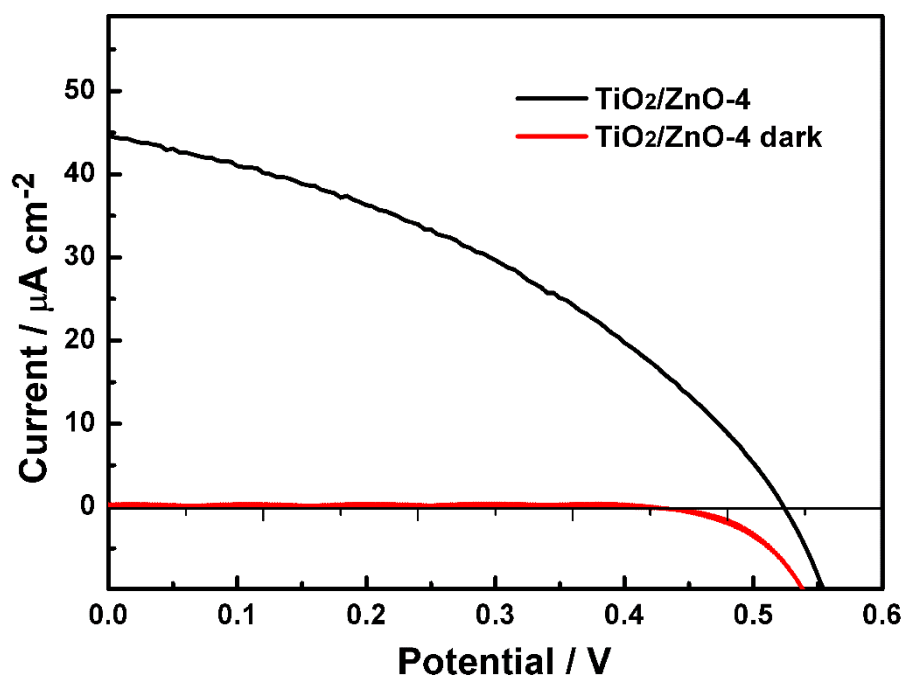

Fig. S5  $J$ - $V$  curves of  $\text{TiO}_2/\text{ZnO-4}$  with/without UV irradiation.

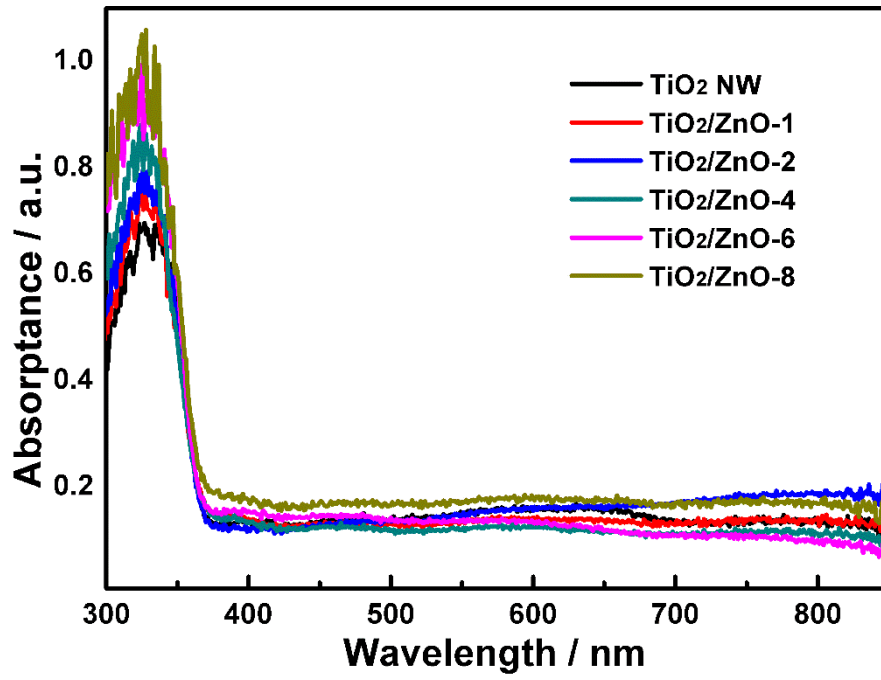

**Fig. S6** The absorption behavior of the TiO<sub>2</sub>/ZnO films in the wavelength range from 300 nm to 850 nm.

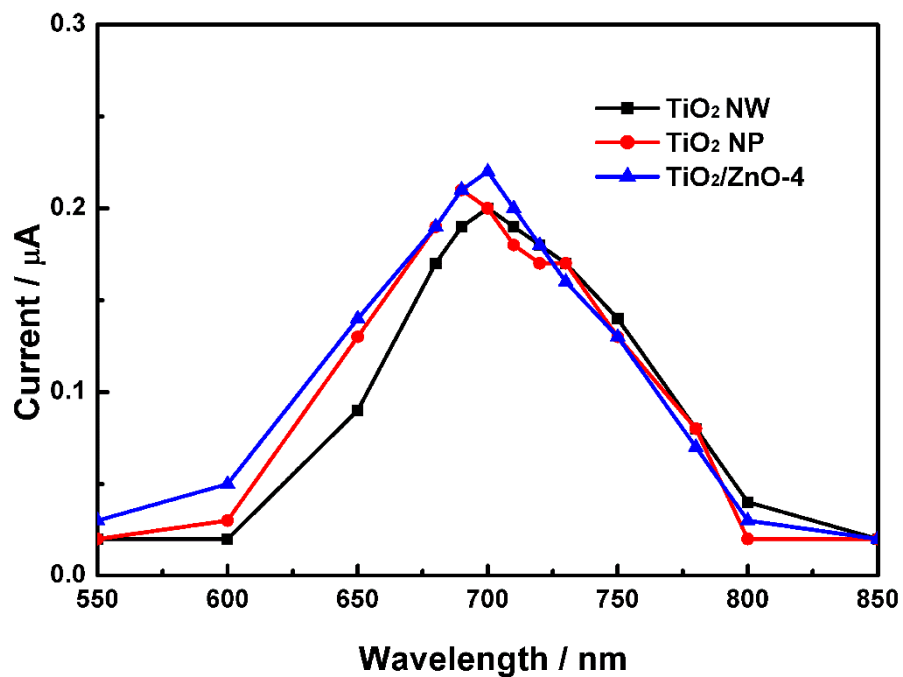

Fig. S7 Spectral responses of  $J_{sc}$  signals in visible range.

<sup>1</sup> R. van de Krol, Principles of Photoelectrochemical Cells, in: R. van de Krol, M. Grätzel (Eds.) Photoelectrochemical Hydrogen Production, Springer US, 2012, pp. 13-67.
